# Supplementary material for: Differential conformational dynamics in the closely homologous FK506-binding domains of FKBP51 and FKBP52
Source: PubMed Central journal article supplement (PMC4060953; doi:10.1042/bj20140232), 2014-06-13
Supplement: bj4610115add.pdf [file bj4610115add.pdf]

## SUPPLEMENTARY ONLINE DATA

## Differential conformational dynamics in the closely homologous FK506-binding domains of FKBP51 and FKBP52

Sourajit M. MUSTAFI\*, David M. LeMASTER\*† and Griselda HERNÁNDEZ\*†<sup>1</sup>

\*Wadsworth Center, New York State Department of Health, Empire State Plaza, Albany, NY 12201, U.S.A.

†Department of Biomedical Sciences, School of Public Health, University at Albany – SUNY, Empire State Plaza, Albany, NY 12201, U.S.A.

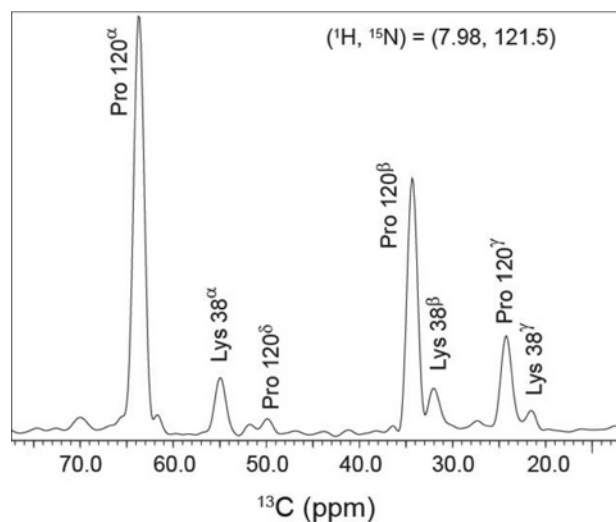

**Figure S1** 1D slice from a 3D HCCCONH NMR experiment on the U-<sup>13</sup>C, <sup>15</sup>N-enriched FK1 domain of FKBP52

Correlations to the amide <sup>1</sup>H and <sup>15</sup>N frequencies for Lys<sup>121</sup> were observed for the side-chain <sup>13</sup>C resonances of Pro<sup>120</sup>, indicating a 10.0 p.p.m. separation for the C<sup>β</sup> and C<sup>γ</sup> resonances. Partial overlap was also observed for the <sup>13</sup>C correlations of Lys<sup>38</sup> to the nearby <sup>1</sup>H and <sup>15</sup>N frequencies for the amide of Arg<sup>39</sup>.

<sup>1</sup> To whom correspondence should be addressed (email gch02@health.state.ny.us).

Backbone resonance assignments for FKBP51 and FKBP52 have been deposited in the BMRB under accession numbers 19787 and 19788 respectively.

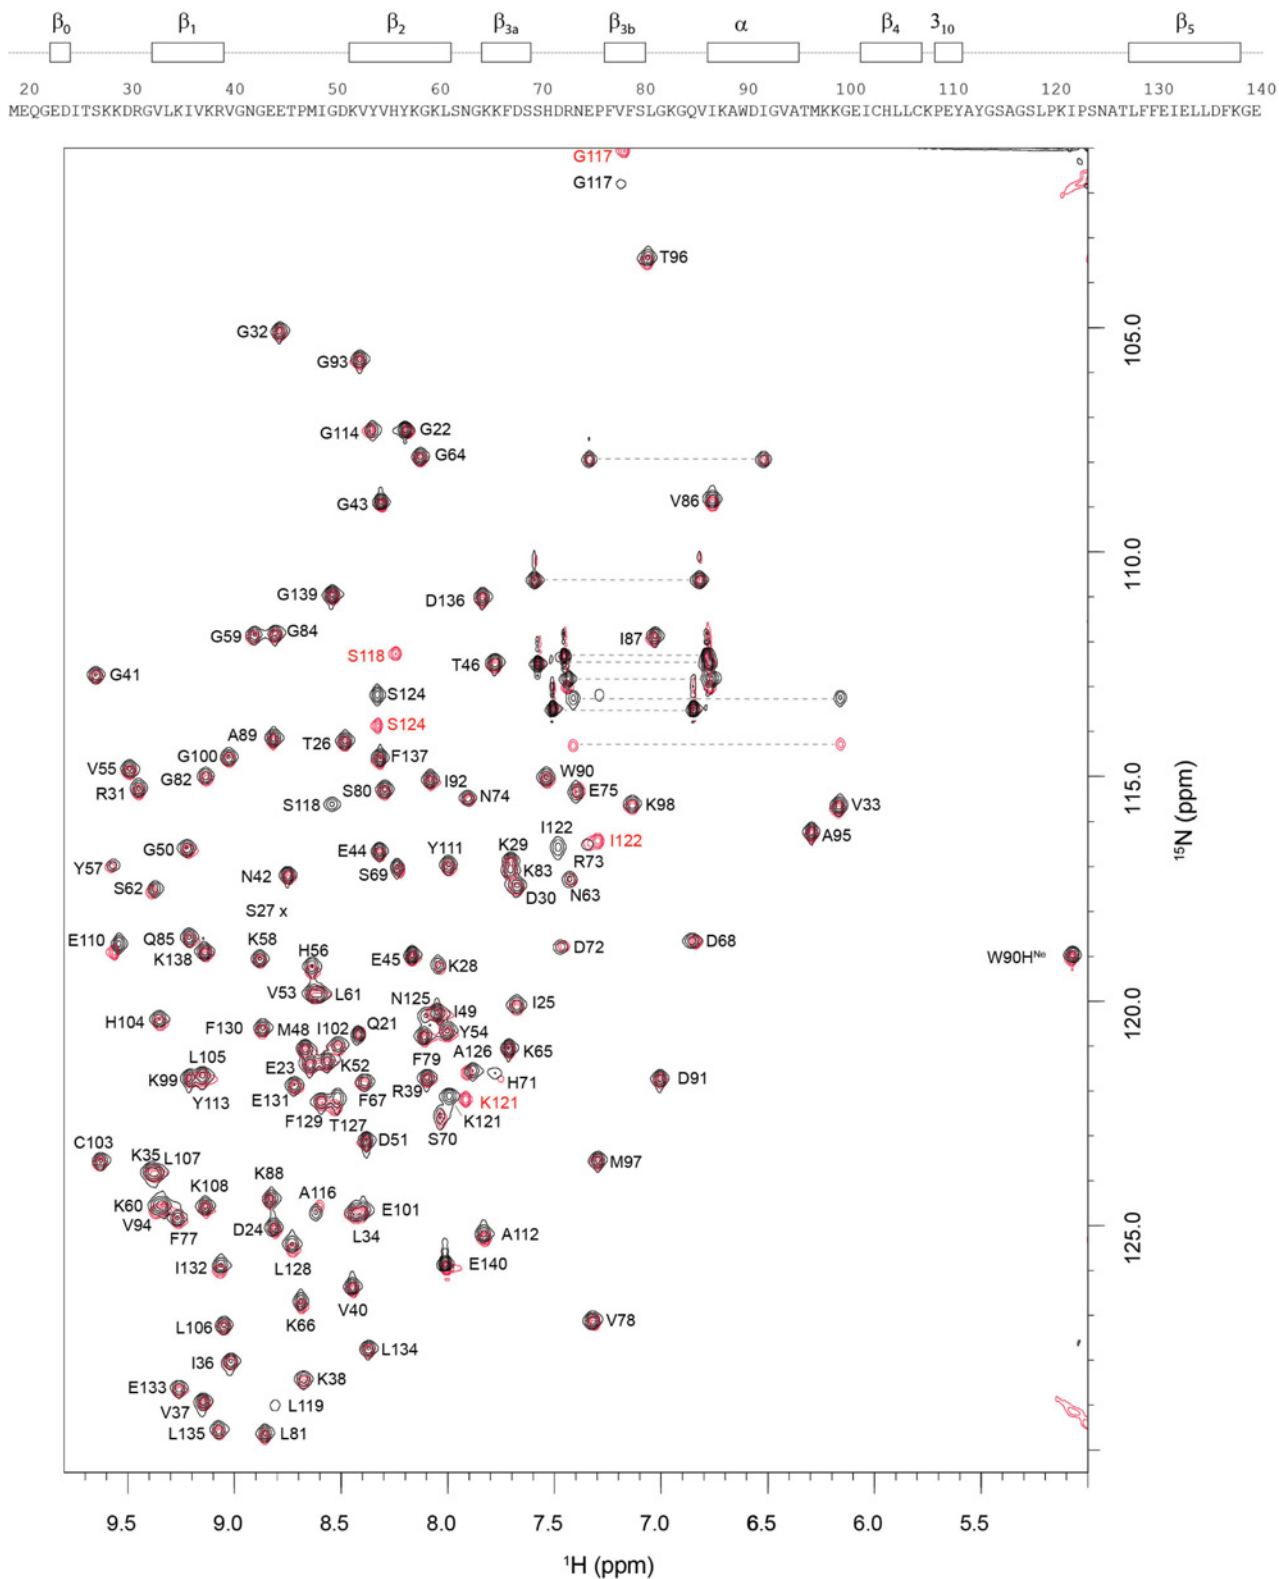

**Figure S2** 2D  $^1\text{H}$ - $^{15}\text{N}$ -NMR correlation spectra for  $^{15}\text{N}$  enriched the wild-type (black) and the L119P variant (red) of FKBP51

Resonances for side-chain amides are connected by broken lines.

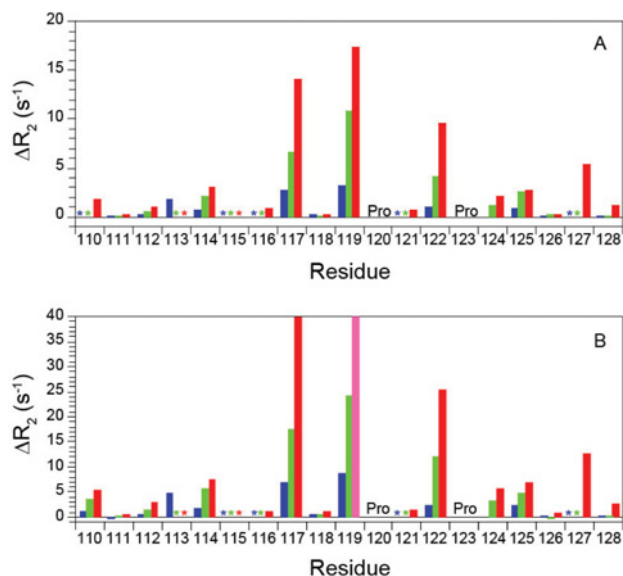

**Figure S3 Differential transverse relaxation rates in the  $\beta_4$ - $\beta_5$  loop for the P119L (blue) and P119L/P124S (green) variants of FKBP52 and the L119P variant (red) of FKBP51 compared with the wild-type proteins at 600 MHz (A) and higher field (B)**

Asterisks denote residues for which well-resolved decay profiles were not obtained. For residue 119 of FKBP51, the attenuated peak intensities at 900 MHz precluded a reliable rate determination, although the value is  $>50 s^{-1}$  (pink). The higher field data for the two variants of FKBP52 were collected at 800 MHz, whereas 900 MHz was used for the other samples. Following normalization to the mean  $R_2$  value for the wild-type FKBP52 data, for residues exhibiting a differential larger than  $1.0 s^{-1}$  that difference was scaled by the square of the magnetic field  $(9/8)^2$ , consistent with motion near the fast exchange limit.

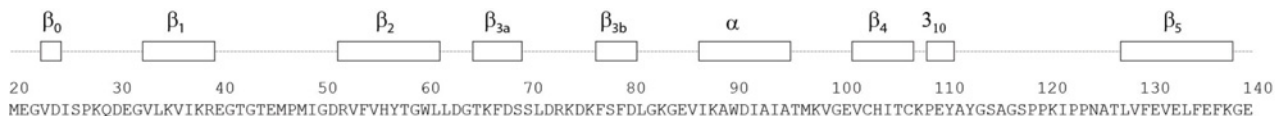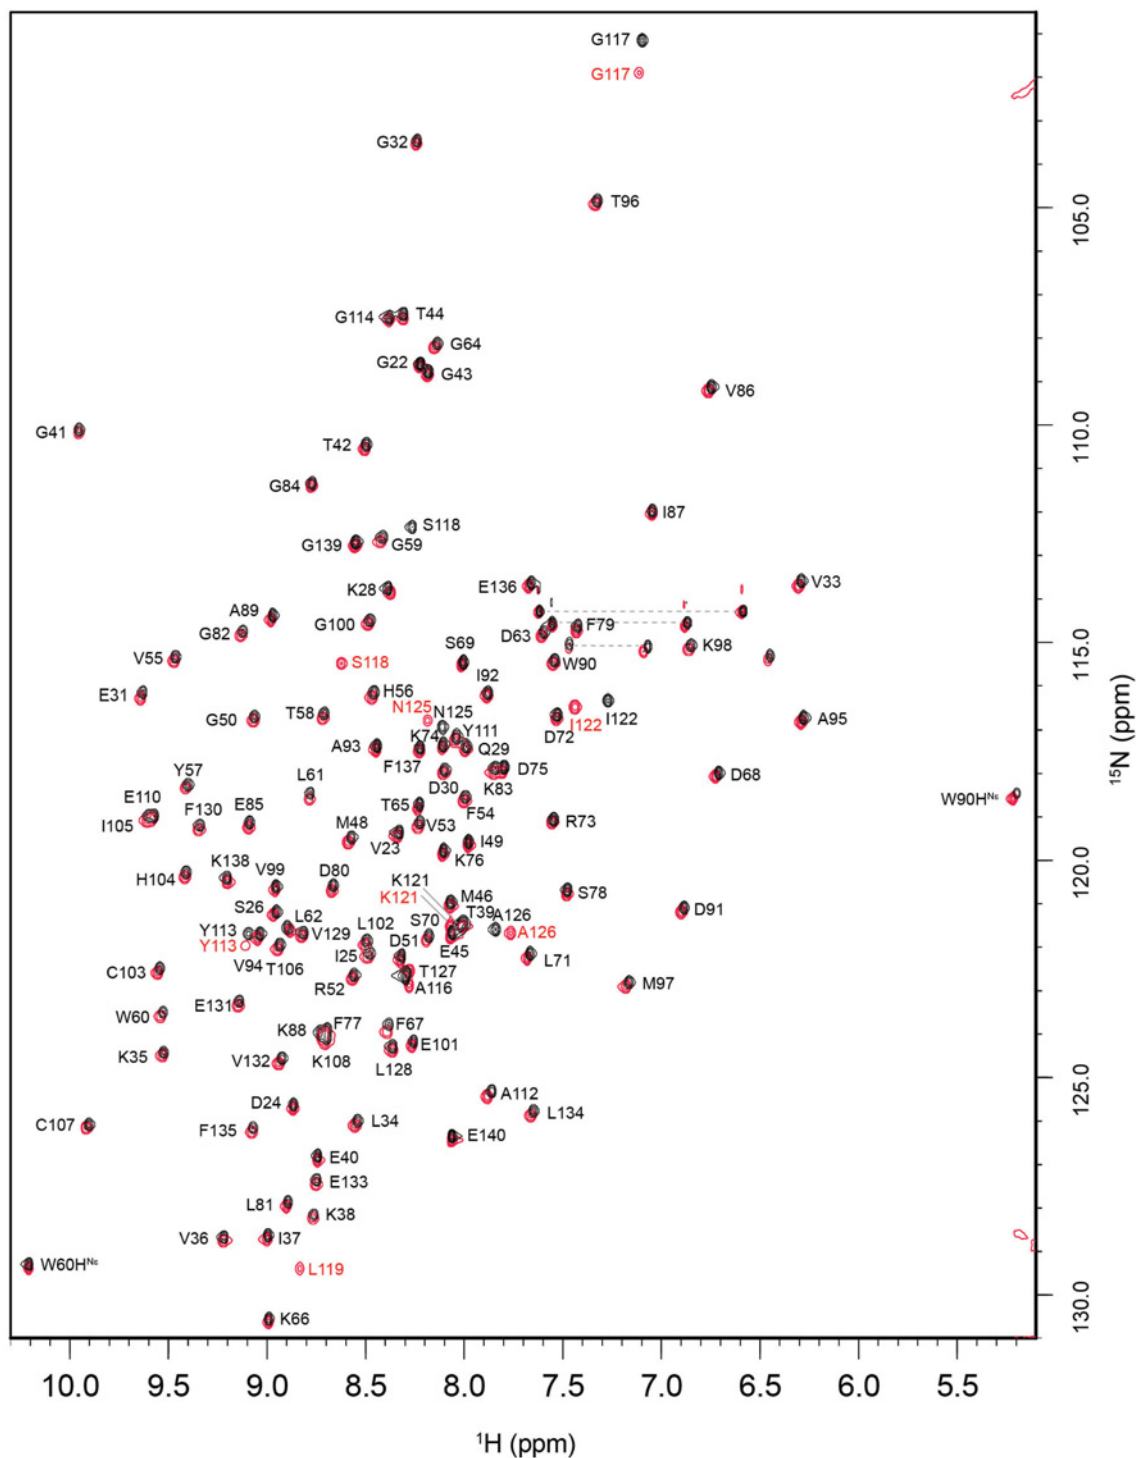

**Figure S4** 2D  $^1\text{H}$ - $^{15}\text{N}$ -NMR correlation spectra for  $^{15}\text{N}$  enriched the wild-type (black) and the P119L variant (red) of FKBP52

Resonances for side-chain amides are connected by broken lines.

Received 19 February 2014/27 March 2014; accepted 22 April 2014  
Published as BJ Immediate Publication 22 April 2014, doi:10.1042/BJ20140232
